# Supplementary material for: Rheumatoid arthritis CD14+ monocytes display metabolic and inflammatory dysfunction, a phenotype that precedes clinical manifestation of disease
Source: PubMed Central journal article supplement — Clin Transl Immunology. 2021 Jan 19;10(1):e1237. doi: 10.1002/cti2.1237 (PMC7815439; doi:10.1002/cti2.1237), 2021-01-19
Supplement: CTI2-10-e1237-s001.pdf [file CTI2-10-e1237-s001.pdf]

| <b>Gene Name</b>                      | <b>Forward Primer</b>         | <b>Reverse Primer</b>           |
|---------------------------------------|-------------------------------|---------------------------------|
| <b><i>RPLPO</i></b>                   | 5' GCGTCCTCGTGGAAGTGACATCG 3' | 5' TCAGGGATTGCCACGCAGGG 3'      |
| <b><i>HPRT1</i></b>                   | 5' ATGGACAGGACTGAACGTCTTG 3'  | 5' GGCTACAATGTGATGGCCTC 3'      |
| <b><i>TNF<math>\alpha</math></i></b>  | 5' ACCTCTCTCTAATCAGCCCTC 3'   | 5' GGTTGAGAAGATGATCTGACTG 3'    |
| <b><i>IL-6</i></b>                    | 5' CCCTGAGAAAGGAGACATGTAAC 3' | 5' CCTCTTTGCTGCTTTCACACATG 3'   |
| <b><i>IL-1<math>\beta</math></i></b>  | 5' CTCAAGTGTCTGAAGCAGCCAT 3'  | 5' CATCATTTCACTGGCGAGCTCA 3'    |
| <b><i>OSM</i></b>                     | 5' ACTCCTGGACCCCTATATACG 3'   | 5' AGTGCTCTCTCAGTTTAGGAACAT 3'  |
| <b><i>CXCL10</i></b>                  | 5' TTCAAGGAGTACCTCTCTAGAA 3'  | 5' GGTTGATTACTAATGCTGATGCAG 3'  |
| <b><i>CXCL11</i></b>                  | 5' GGCTTCCCATGTTCAAAGAG 3'    | 5' TCTCAATATCTGCCACTTTCCTG 3'   |
| <b><i>IL-27</i></b>                   | 5' CTTTGC GGAATCTCACCTGCC 3'  | 5' AGGGAAACATCAGGGAGCTGC 3'     |
| <b><i>IL-8</i></b>                    | 5' TTGGCAGCCTTCTGATTC 3'      | 5' TGGCAAACTGCACCTTCAC 3'       |
| <b><i>PFKFB3</i></b>                  | 5' ACCAAAGATCACCCACGGATGT 3'  | 5' AGCGAGTGCAGAATGGACACAA 3'    |
| <b><i>HK2</i></b>                     | 5' TTCTGTCTCAGATTGAGAGTGAC 3' | 5' TTGCAGGATGGCTCGGACTTG 3'     |
| <b><i>HIF1<math>\alpha</math></i></b> | 5' GAAACTTCTGGATGCTGGTGATT 3' | 5' GCAATTCATCTGTGCTTTCATGTCA 3' |
| <b><i>STAT3</i></b>                   | 5' TTCACTTGGGTGGAGAAG 3'      | 5' CGGACTGGATCTGGGTCT 3'        |
| <b><i>IL-1<math>\alpha</math></i></b> | 5' CAAAGAAGTCAAGATGGCCAA 3'   | 5' CTGTAACAGTTCTTCAGGTCT 3'     |

**Supplementary table 1: List of designed primers for real-time PCR analysis**

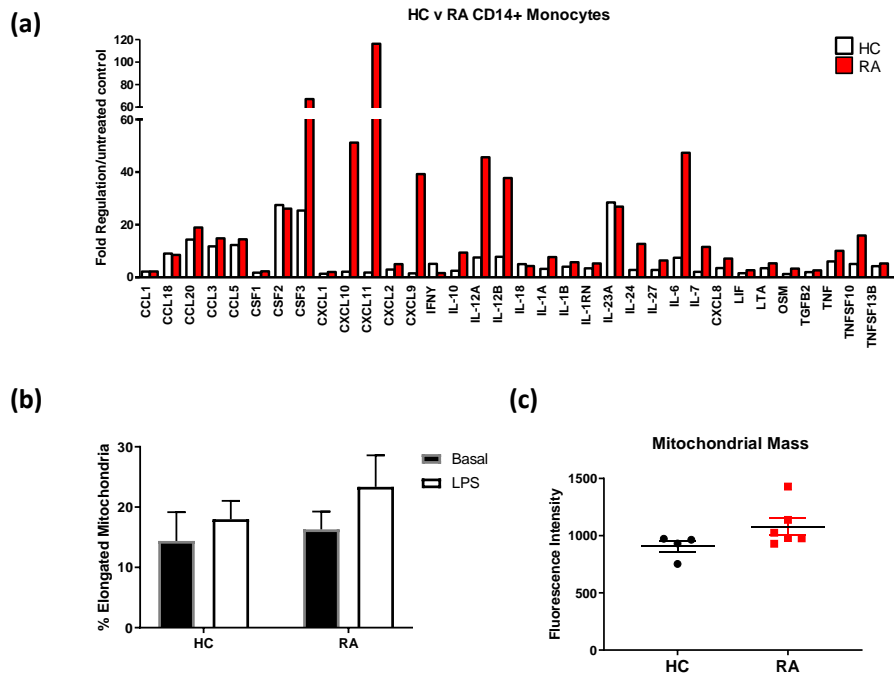

**Supplementary figure 1:**

**(a)** Bar graph demonstrating 34 cytokine/chemokine genes upregulated in response to 3 hr LPS stimulation ( $100 \text{ ng mL}^{-1}$ ) in healthy and RA CD14<sup>+</sup> monocytes (n=3). **(b)** Gating strategy for identification of CD14<sup>+</sup> monocytes in blood. **(c)** Bar graphs demonstrating the frequency of elongated mitochondria as a percentage of total mitochondria present in HC (n=3) and RA (n=3) CD14<sup>+</sup> monocytes +/- LPS. Data expressed as mean  $\pm$  SEM.

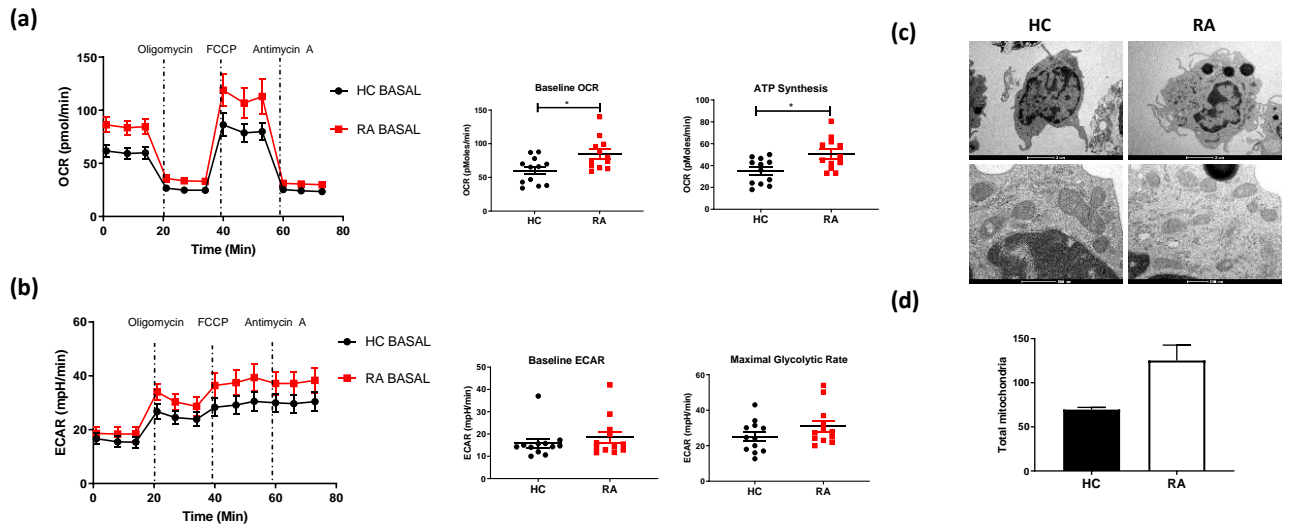

### Supplementary figure 2:

**(a)** Seahorse bioenergetics profile (average) OCR of healthy (n=12) and RA (n=12) monocytes before and after injections of oligomycin, FCCP and antimycin A in *ex vivo* resting monocytes with dot plots depicting baseline OCR and ATP synthesis. **(b)** Seahorse bioenergetics profile (average) ECAR of healthy (n=12) and RA (n=12) monocytes before and after injections of oligomycin, FCCP and antimycin A in *ex vivo* resting monocytes with dot plots depicting baseline ECAR and Maximal Glycolytic Rate. **(c)** Representative TEM images of healthy control and RA *ex vivo* resting monocytes. Scale bar represents 2  $\mu\text{m}$  and 500 nm. **(d)** Bar graphs represent quantification of total mitochondria present in HC (n=3) and RA (n=3) CD14<sup>+</sup> resting monocytes. Data expressed as mean  $\pm$  SEM, Mann-Whitney *U*-test and two-way ANOVA used as appropriate, \**P* < 0.05.

(a)

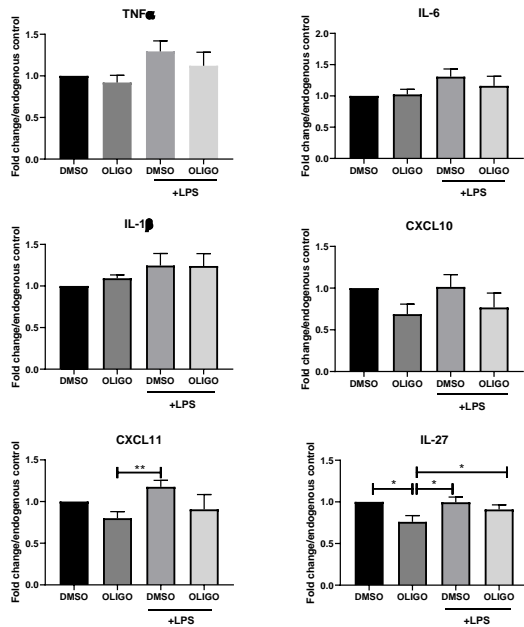

(b)

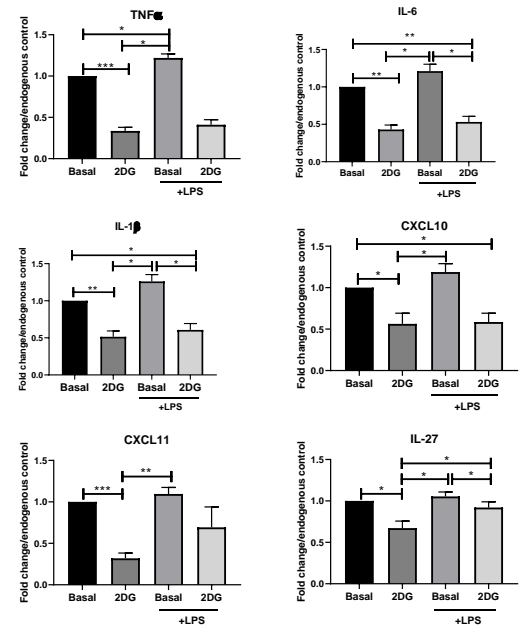

### Supplementary figure 3:

HC monocytes stimulated with LPS (100 ng mL<sup>-1</sup>) for 3 hr +/- (a) oligomycin (n=5) and (b) 2DG (n=4 or 5). Gene expression of *TNF $\alpha$* , *IL-6*, *IL-1 $\beta$* , *CXCL10*, *CXCL11* and *IL-27*. Data expressed as mean  $\pm$  SEM, paired t-test used, \* $P$  < 0.05, \*\* $P$  < 0.01, \*\*\* $P$  < 0.005.

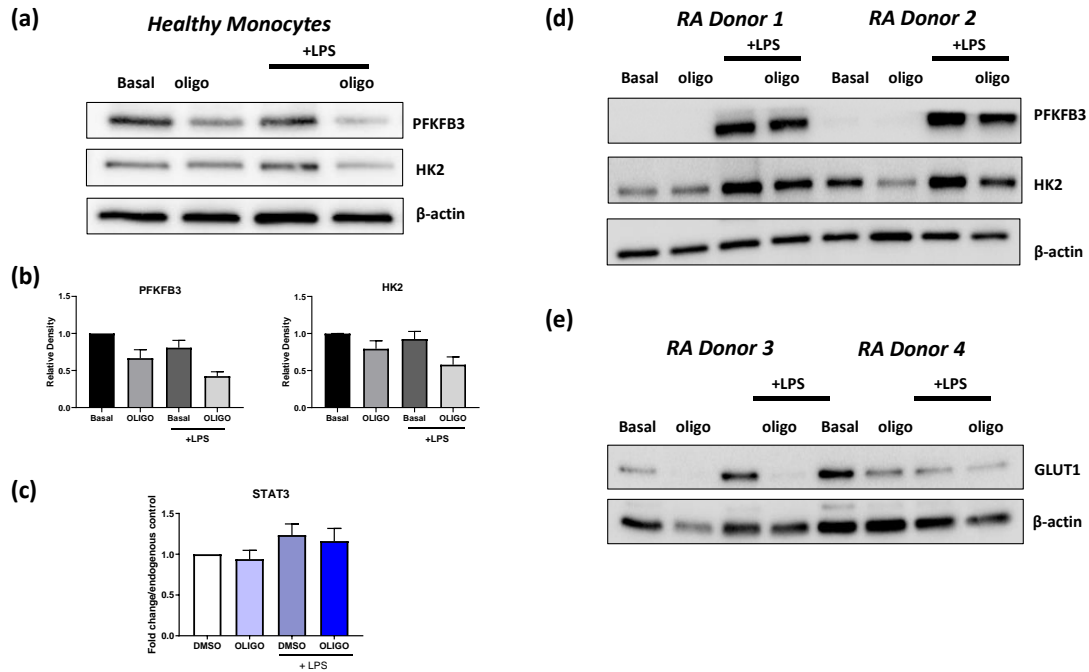

#### Supplementary figure 4:

Representative western blots demonstrating HK2 and PFKFB3 protein expression in HC CD14<sup>+</sup> monocytes stimulated with LPS (100 ng mL<sup>-1</sup>) for 3 hr +/- **(a)** oligomycin and **(c)** 2DG. Bar graphs representing densitometry quantification of PFKFB3 and HK2 normalized to  $\beta$ -actin in HC CD14<sup>+</sup> monocytes stimulated with LPS (100 ng/mL) for 3 hr +/- **(b)** oligomycin (n=4) and **(d)** 2DG (n=4). Data expressed as mean  $\pm$  SEM.

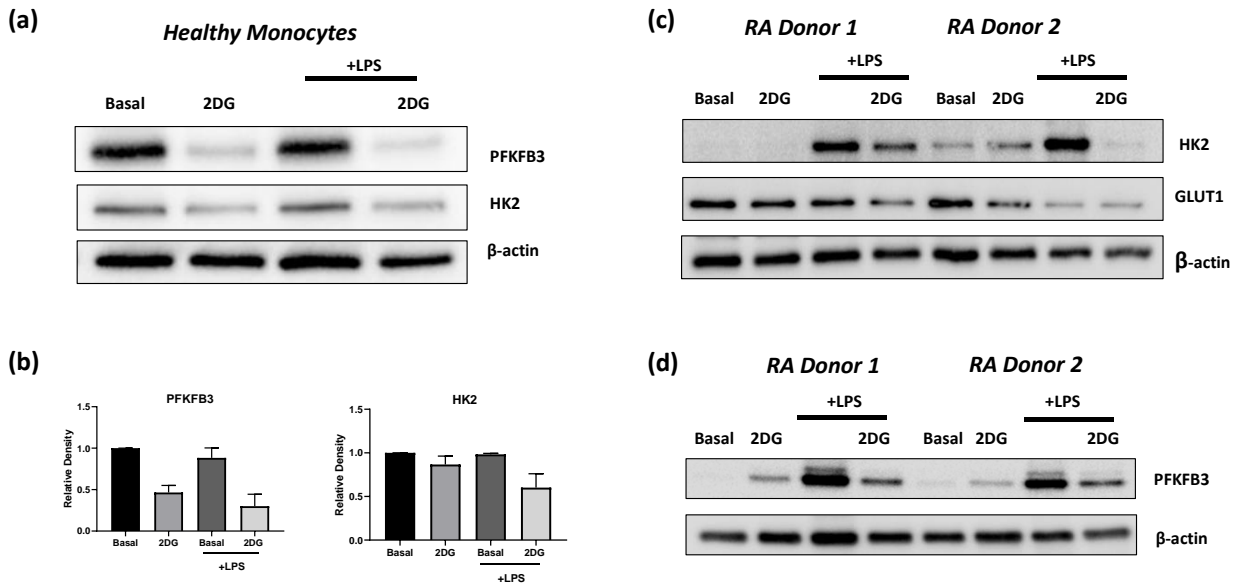

### Supplementary figure 5:

Western blots demonstrating HK2 and PFKFB3 protein expression in two independent RA CD14<sup>+</sup> patient monocytes stimulated with LPS (100 ng mL<sup>-1</sup>) for 3 hr +/- **(a)** oligomycin (n=2) and **(b)** 2DG (n=2). **(c)** *STAT3* gene expression in response to LPS +/- oligomycin in RA CD14<sup>+</sup> monocytes (n=7). Data represented as mean  $\pm$  SEM.

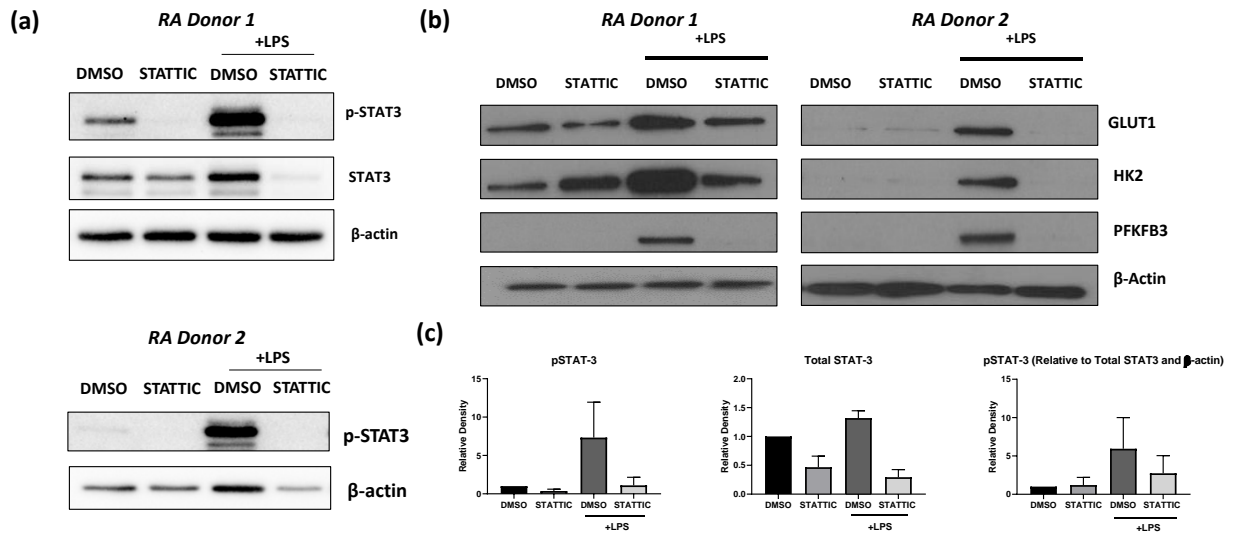

### Supplementary figure 6:

**(a)** Western blots demonstrating pSTAT3 protein expression in RA CD14<sup>+</sup> monocytes (n=2) stimulated with LPS (100 ng mL<sup>-1</sup>) for 3 hr +/- STATTIC. **(b)** Bar graphs representing densitometry quantification of pSTAT3 normalized to  $\beta$ -actin in RA CD14<sup>+</sup> monocytes (n=2) stimulated with LPS (100 ng mL<sup>-1</sup>) for 3 hr +/- STATTIC. **(c)** Western blots demonstrating HK2, PFKFB3 and GLUT1 protein expression in two independent RA CD14<sup>+</sup> patient monocytes stimulated with LPS (100 ng mL<sup>-1</sup>) for 3 hr +/- STATTIC (n=2). Data expressed as mean  $\pm$  SEM.

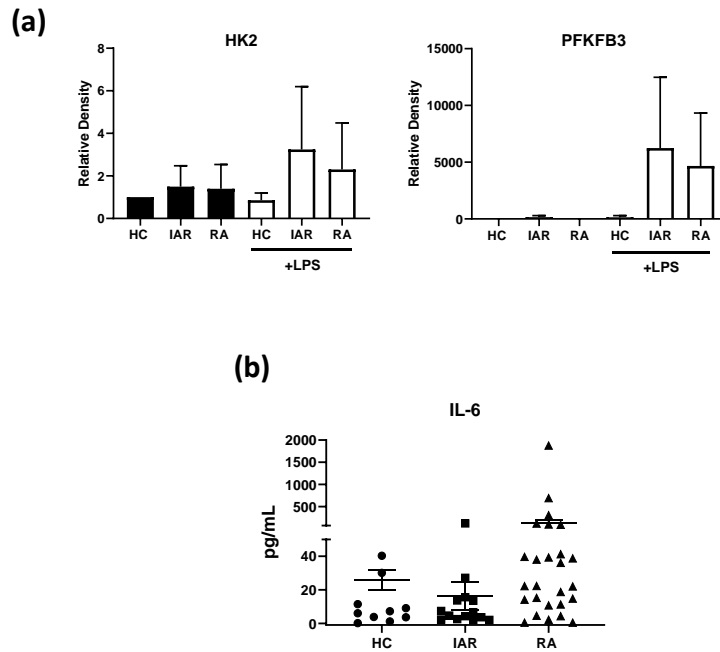

**Supplementary Figure 7:**

**(a)** Bar graphs representing densitometry quantification of HK2 and PFKFB3 normalized to  $\beta$ -actin in HC (n=2), IAR (n=2) and RA (n=2) CD14<sup>+</sup> monocytes following activation with LPS. **(b)** Dot plot representing expression of secreted IL-6 in HC (n=15), IAR (n=14) and RA (n=31) patient serums.
